# Supplementary material
Source: Elsevier journal article supplement (https://comptes-rendus.academie-sciences.fr/chimie/article/10.1016/j.crci.2010.03.019/file/attach/mmc3.pdf)
Supplement: mmc3 [file mmc3.pdf]

# checkCIF/PLATON report (basic structural check)

No syntax errors found.

Please wait while processing ....

[CIF dictionary](#)

[Interpreting this report](#)

## Datablock: Compound2e

Bond precision: C-C = 0.0018 Å Wavelength=0.71073

Cell: a=10.4725(8) b=10.7491(8) c=11.9506(9)  
alpha=74.043(1) beta=66.316(1) gamma=63.932(1)

Temperature: 123 K

|                        | Calculated      | Reported        |
|------------------------|-----------------|-----------------|
| Volume                 | 1098.70(14)     | 1098.70(14)     |
| Space group            | P -1            | P -1            |
| Hall group             | -P 1            | -P 1            |
| Moiety formula         | C34 H74 Al4 La2 | C34 H74 Al4 La2 |
| Sum formula            | C34 H74 Al4 La2 | C34 H74 Al4 La2 |
| Mr                     | 868.67          | 868.67          |
| Dx, g cm <sup>-3</sup> | 1.313           | 1.313           |
| Z                      | 1               | 1               |
| Mu (mm <sup>-1</sup> ) | 2.016           | 2.016           |
| F000                   | 444.0           | 444.0           |
| F000'                  | 443.74          |                 |
| h, k, lmax             | 14, 15, 16      | 14, 15, 16      |
| Nref                   | 6485            | 6470            |
| Tmin, Tmax             | 0.526, 0.629    | 0.368, 0.654    |
| Tmin'                  | 0.347           |                 |

Correction method= MULTI-SCAN

Data completeness= 0.998 Theta(max)= 30.110

R(reflections)= 0.0126( 6330) wR2(reflections)= 0.0333( 6470)

S = 1.120 Npar= 242

The following ALERTS were generated. Each ALERT has the format

**test-name ALERT alert-type alert-level.**

Click on the hyperlinks for more details of the test.

### Alert level A

|                                   |                                                  |                  |       |             |
|-----------------------------------|--------------------------------------------------|------------------|-------|-------------|
| <a href="#">PLAT390_ALERT_3_A</a> | Deviating Methyl C1                              | X-C-H Bond Angle | ..... | 174.10 Deg. |
| <a href="#">PLAT390_ALERT_3_A</a> | Deviating Methyl C1                              | X-C-H Bond Angle | ..... | 72.50 Deg.  |
| <a href="#">PLAT390_ALERT_3_A</a> | Deviating Methyl C1                              | X-C-H Bond Angle | ..... | 73.00 Deg.  |
| <a href="#">PLAT390_ALERT_3_A</a> | Deviating Methyl C2                              | X-C-H Bond Angle | ..... | 94.30 Deg.  |
| <a href="#">PLAT390_ALERT_3_A</a> | Deviating Methyl C5                              | X-C-H Bond Angle | ..... | 71.50 Deg.  |
| <a href="#">PLAT390_ALERT_3_A</a> | Deviating Methyl C5                              | X-C-H Bond Angle | ..... | 84.00 Deg.  |
| <a href="#">PLAT390_ALERT_3_A</a> | Deviating Methyl C5                              | X-C-H Bond Angle | ..... | 171.90 Deg. |
| <a href="#">PLAT390_ALERT_3_A</a> | Deviating Methyl C5                              | X-C-H Bond Angle | ..... | 126.40 Deg. |
| <a href="#">PLAT390_ALERT_3_A</a> | Deviating Methyl C5                              | X-C-H Bond Angle | ..... | 94.40 Deg.  |
| <a href="#">PLAT390_ALERT_3_A</a> | Deviating Methyl C6                              | X-C-H Bond Angle | ..... | 73.40 Deg.  |
| <a href="#">PLAT390_ALERT_3_A</a> | Deviating Methyl C6                              | X-C-H Bond Angle | ..... | 81.90 Deg.  |
| <a href="#">PLAT390_ALERT_3_A</a> | Deviating Methyl C6                              | X-C-H Bond Angle | ..... | 170.40 Deg. |
| <a href="#">PLAT390_ALERT_3_A</a> | Deviating Methyl C6                              | X-C-H Bond Angle | ..... | 88.40 Deg.  |
| <a href="#">PLAT780_ALERT_1_A</a> | Coordinates do not Form a Properly Connected Set |                  |       | ?           |

### Alert level B

|                                   |                     |                  |       |             |
|-----------------------------------|---------------------|------------------|-------|-------------|
| <a href="#">PLAT390_ALERT_3_B</a> | Deviating Methyl C1 | X-C-H Bond Angle | ..... | 97.20 Deg.  |
| <a href="#">PLAT390_ALERT_3_B</a> | Deviating Methyl C1 | X-C-H Bond Angle | ..... | 119.80 Deg. |
| <a href="#">PLAT390_ALERT_3_B</a> | Deviating Methyl C1 | X-C-H Bond Angle | ..... | 120.60 Deg. |

|                                   |                     |                        |             |
|-----------------------------------|---------------------|------------------------|-------------|
| <a href="#">PLAT390_ALERT_3_B</a> | Deviating Methyl C2 | X-C-H Bond Angle ..... | 121.20 Deg. |
| <a href="#">PLAT390_ALERT_3_B</a> | Deviating Methyl C2 | X-C-H Bond Angle ..... | 119.60 Deg. |
| <a href="#">PLAT390_ALERT_3_B</a> | Deviating Methyl C6 | X-C-H Bond Angle ..... | 123.50 Deg. |
| <a href="#">PLAT390_ALERT_3_B</a> | Deviating Methyl C6 | X-C-H Bond Angle ..... | 120.00 Deg. |

### ● Alert level C

|                                   |                                                  |                        |             |
|-----------------------------------|--------------------------------------------------|------------------------|-------------|
| <a href="#">PLAT094_ALERT_2_C</a> | Ratio of Maximum / Minimum Residual Density .... | 2.26                   |             |
| <a href="#">PLAT232_ALERT_2_C</a> | Hirshfeld Test Diff (M-X) Al2 -- C8 ..           | 5.10 su                |             |
| <a href="#">PLAT390_ALERT_3_C</a> | Deviating Methyl C5                              | X-C-H Bond Angle ..... | 116.50 Deg. |

### ● Alert level G

|                                   |                                                  |            |
|-----------------------------------|--------------------------------------------------|------------|
| <a href="#">PLAT860_ALERT_3_G</a> | Note: Number of Least-Squares Restraints .....   | 30         |
| <a href="#">PLAT154_ALERT_1_G</a> | The su's on the Cell Angles are Equal (x 10000)  | 100 Deg.   |
| <a href="#">PLAT164_ALERT_4_G</a> | Nr. of Refined C-H H-Atoms in Heavy-Atom Struct. | 16         |
| <a href="#">PLAT764_ALERT_4_G</a> | Overcomplete CIF Bond List Detected (Rep/Expd) . | 1.28 Ratio |

- 14 **ALERT level A** = In general: serious problem  
7 **ALERT level B** = Potentially serious problem  
3 **ALERT level C** = Check and explain  
4 **ALERT level G** = General alerts; check
- 2 ALERT type 1 CIF construction/syntax error, inconsistent or missing data  
2 ALERT type 2 Indicator that the structure model may be wrong or deficient  
22 ALERT type 3 Indicator that the structure quality may be low  
2 ALERT type 4 Improvement, methodology, query or suggestion  
0 ALERT type 5 Informative message, check

## Publication of your CIF in IUCr journals

A basic structural check has been run on your CIF. These basic checks will be run on all CIFs submitted for publication in IUCr journals (*Acta Crystallographica*, *Journal of Applied Crystallography*, *Journal of Synchrotron Radiation*); however, if you intend to submit to *Acta Crystallographica Section C* or *E*, you should make sure that [full publication checks](#) are run on the final version of your CIF prior to submission.

## Publication of your CIF in other journals

Please refer to the *Notes for Authors* of the relevant journal for any special instructions relating to CIF submission.

PLATON version of 13/08/2009; check.def file version of 12/08/2009

## Datablock Compound2e - ellipsoid plot

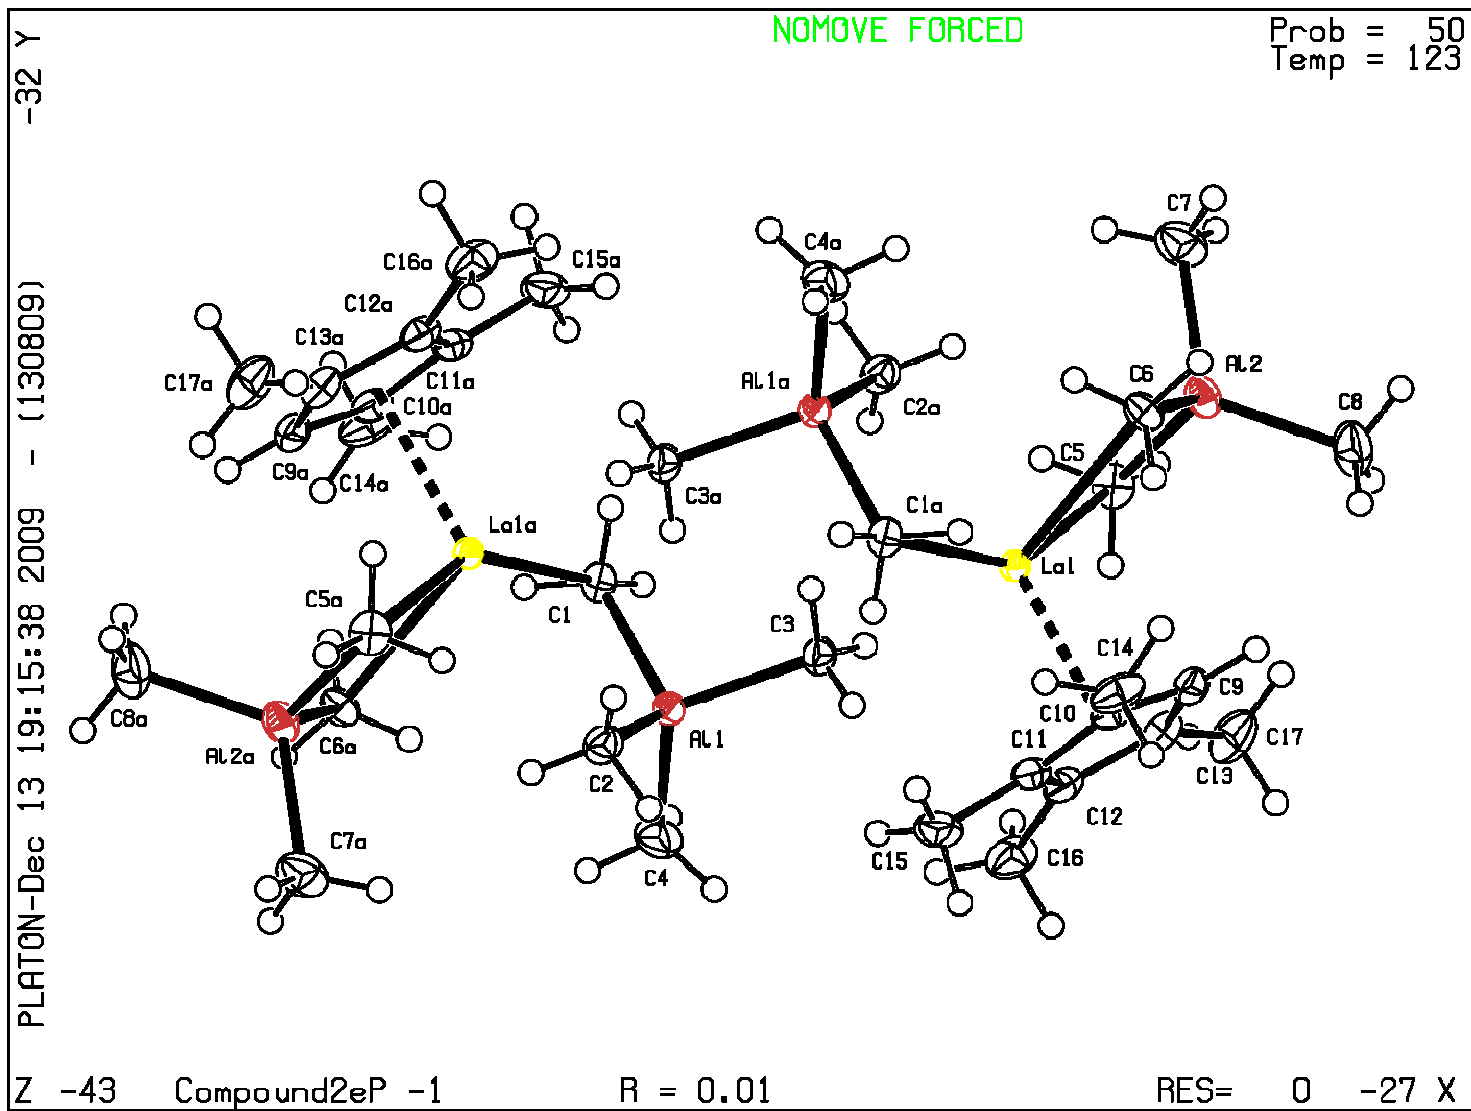

[Download CIF editor \(publCIF\) from the IUCr](#)  
[Download CIF editor \(enCIFer\) from the CCDC](#)  
[Test a new CIF entry](#)
